# Supplementary material
Source: PubMed Central journal article supplement (PMC4716704)
Supplement: mmc1.pdf [file mmc1.pdf]

The American Journal of Human Genetics

Supplemental Data

## **Genetic Diversity and Association Studies**

**in US Hispanic/Latino Populations: Applications**

**in the Hispanic Community Health Study/Study of Latinos**

**Matthew P. Conomos, Cecelia A. Laurie, Adrienne M. Stilp, Stephanie M. Gogarten, Caitlin P. McHugh, Sarah C. Nelson, Tamar Sofer, Lindsay Fernández-Rhodes, Anne E. Justice, Mariaelisa Graff, Kristin L. Young, Amanda A. Seyerle, Christy L. Avery, Kent D. Taylor, Jerome I. Rotter, Gregory A. Talavera, Martha L. Daviglus, Sylvia Wassertheil-Smoller, Neil Schneiderman, Gerardo Heiss, Robert C. Kaplan, Nora Franceschini, Alex P. Reiner, John R. Shaffer, R. Graham Barr, Kathleen F. Kerr, Sharon R. Browning, Brian L. Browning, Bruce S. Weir, M. Larissa Avilés-Santa, George J. Papanicolaou, Thomas Lumley, Adam A. Szpiro, Kari E. North, Ken Rice, Timothy A. Thornton, and Cathy C. Laurie**

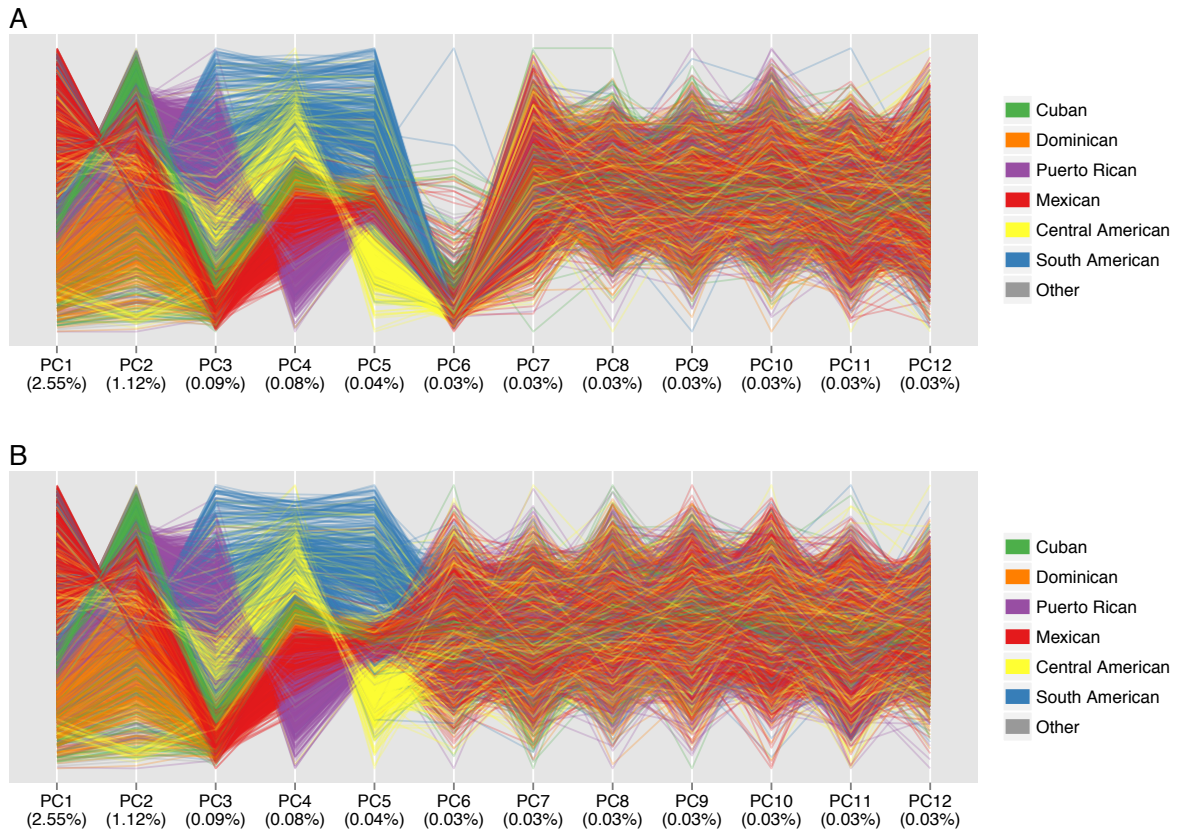

**Figure S1: Principal components with and without 19 individuals having a high proportion of East Asian ancestry**

(A) Parallel coordinates of the first 12 PCs using all HCHS/SOL individuals. PC6 separates a small number of individuals with predominantly East Asian ancestry.

(B) Parallel coordinates for the first 12 PCs for all individuals except for the 19 individuals with high East Asian ancestry. Percent variance accounted for is given for each PC in the horizontal axis labels. Color-coding is by self-identified background. "Other" includes subjects whose background is multiple, other or had a missing value.

The 12 parallel vertical lines of equal length correspond to the first 12 PCs. Each individual is represented by a set of line segments connecting their PC values.

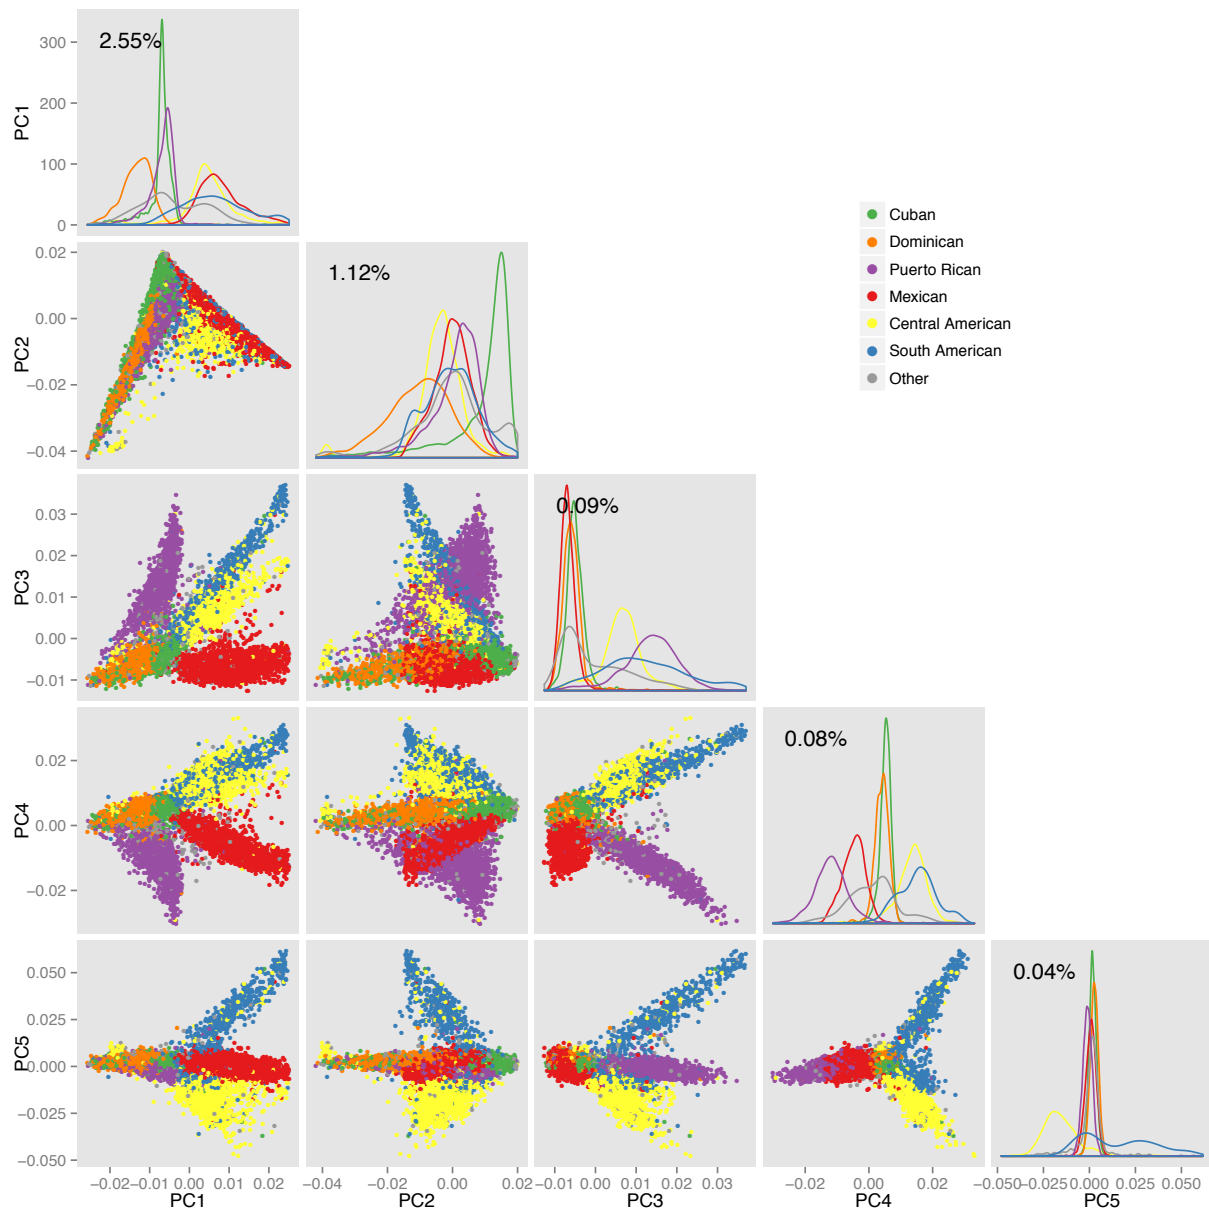

**Figure S2: Pairwise PC plots for PCA of HCHS/SOL participants**

All participants except the outliers with high East Asian ancestry were included in the PCA. Color-coding is by self-identified background. “Other” includes subjects whose background is multiple, other or had a missing value. The diagonal has density plots for the PC on the horizontal axis and the percent of variance accounted for by that PC.

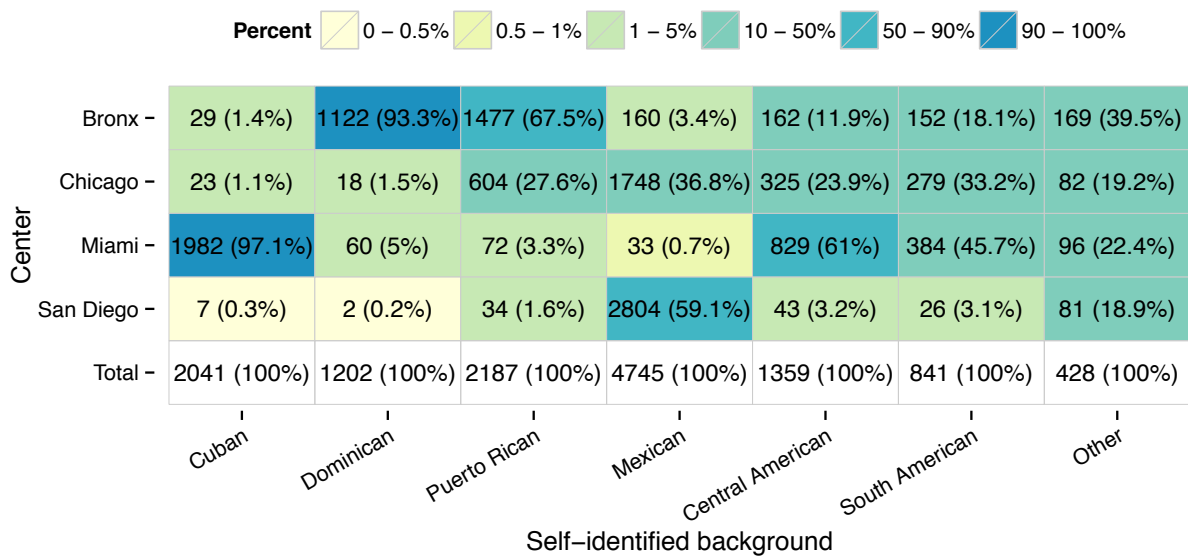

**Figure S3: Cross-classification of recruitment center and self-identified background**

The number in each box shows the number of genotyped participants from each recruitment center and self-identified background, while the color indicates the percentage of participants from each center for a given self-identified background. “Other” includes subjects whose background is multiple, other or had a missing value.

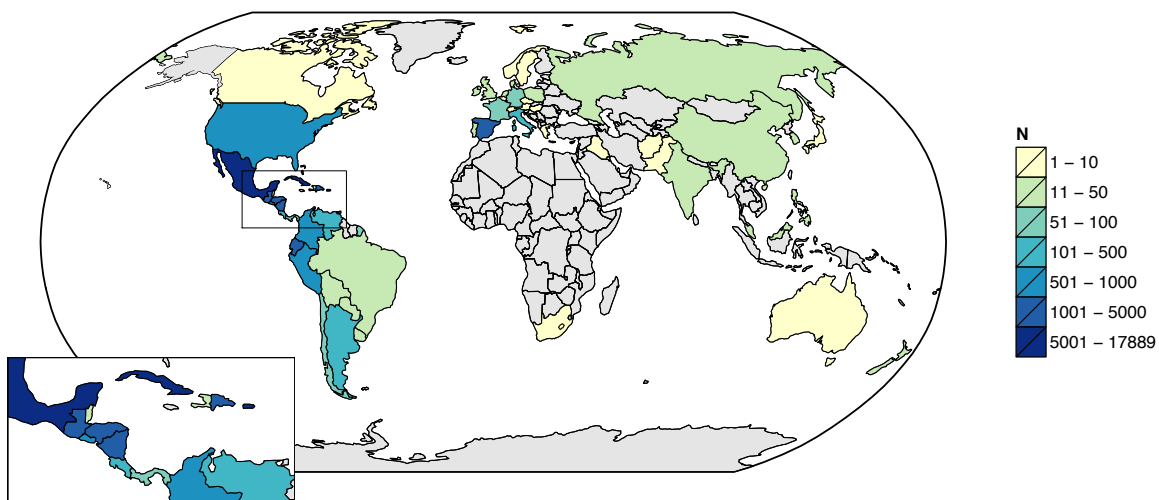

**Figure S4: Grandparental origins for HCHS/SOL participants**

World map with countries color-coded by the number of grandparents reported to originate from each country, with an inset that shows a larger version of Central America. Specific country origins for 49,626 grandparents were reported by 12,698 genotyped participants. The majority of grandparents come from the Americas. Grandparents from the U.S. are all placed in the lower 48 states (Alaska and Hawaii are colored grey even though it is possible that some U.S. grandparents could have come from those states). Grandparents from Puerto Rico are assigned to Puerto Rico, rather than the U.S.

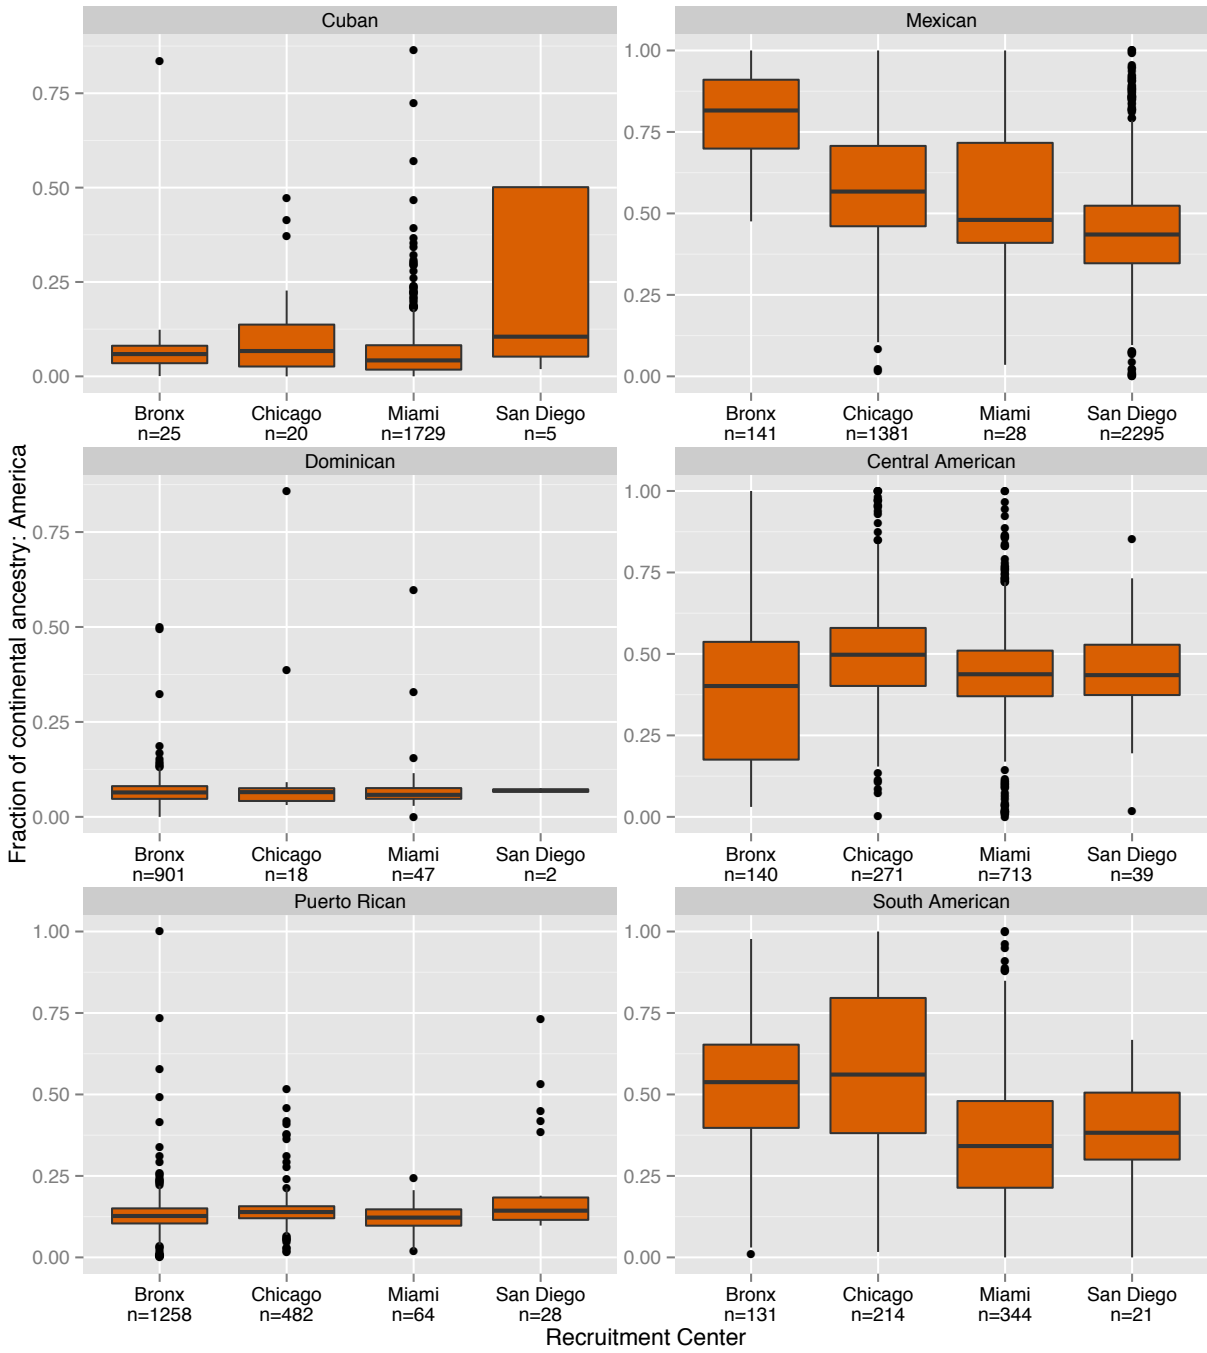

**Figure S5: Distributions of the fraction of Amerindian ancestry by recruitment center and self-identified background**

Boxplots showing the distributions of Amerindian ancestry proportions estimated for unrelated subjects only. Sample size for each center within a background group is indicated in the axis labels.

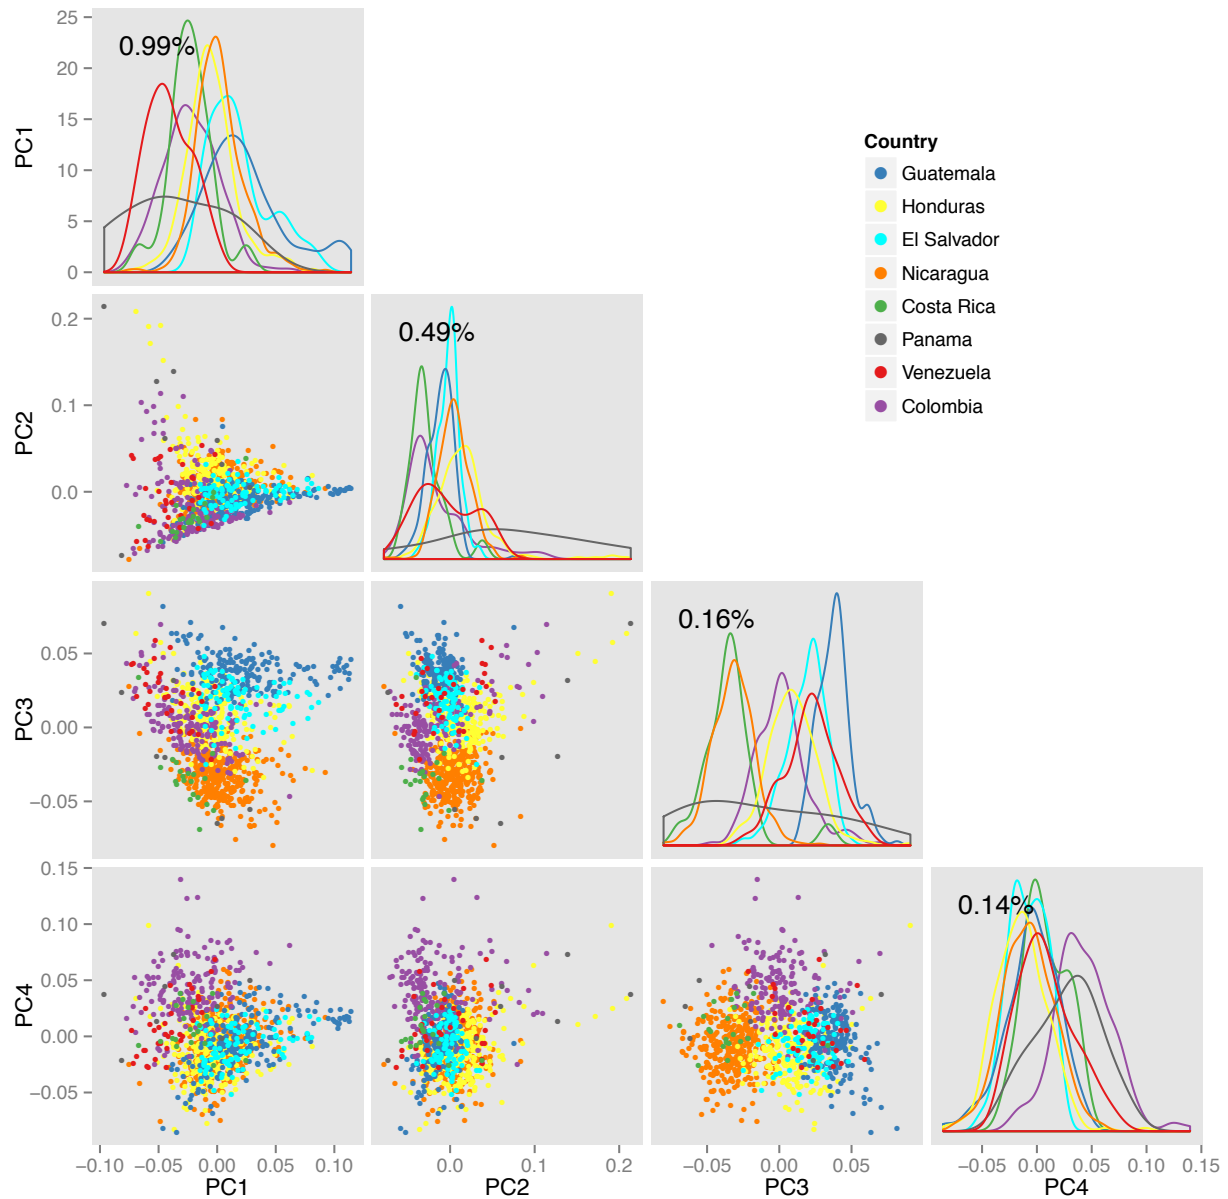

**Figure S6: PCA of HCHS/SOL participants with all four grandparents from the same country for Central America, Colombia and Venezuela**

Pairs plot showing PCs calculated using 1,094 unrelated subjects with all four grandparents from the countries given in the legend. The group of 37 outliers with high proportions of African ancestry (see Methods) were excluded. The diagonal has density plots for the PC on the horizontal axis and the percent of variance accounted for by that PC. The SNP set used was identical to the overall PCA excluding the outliers with high East Asian ancestry.

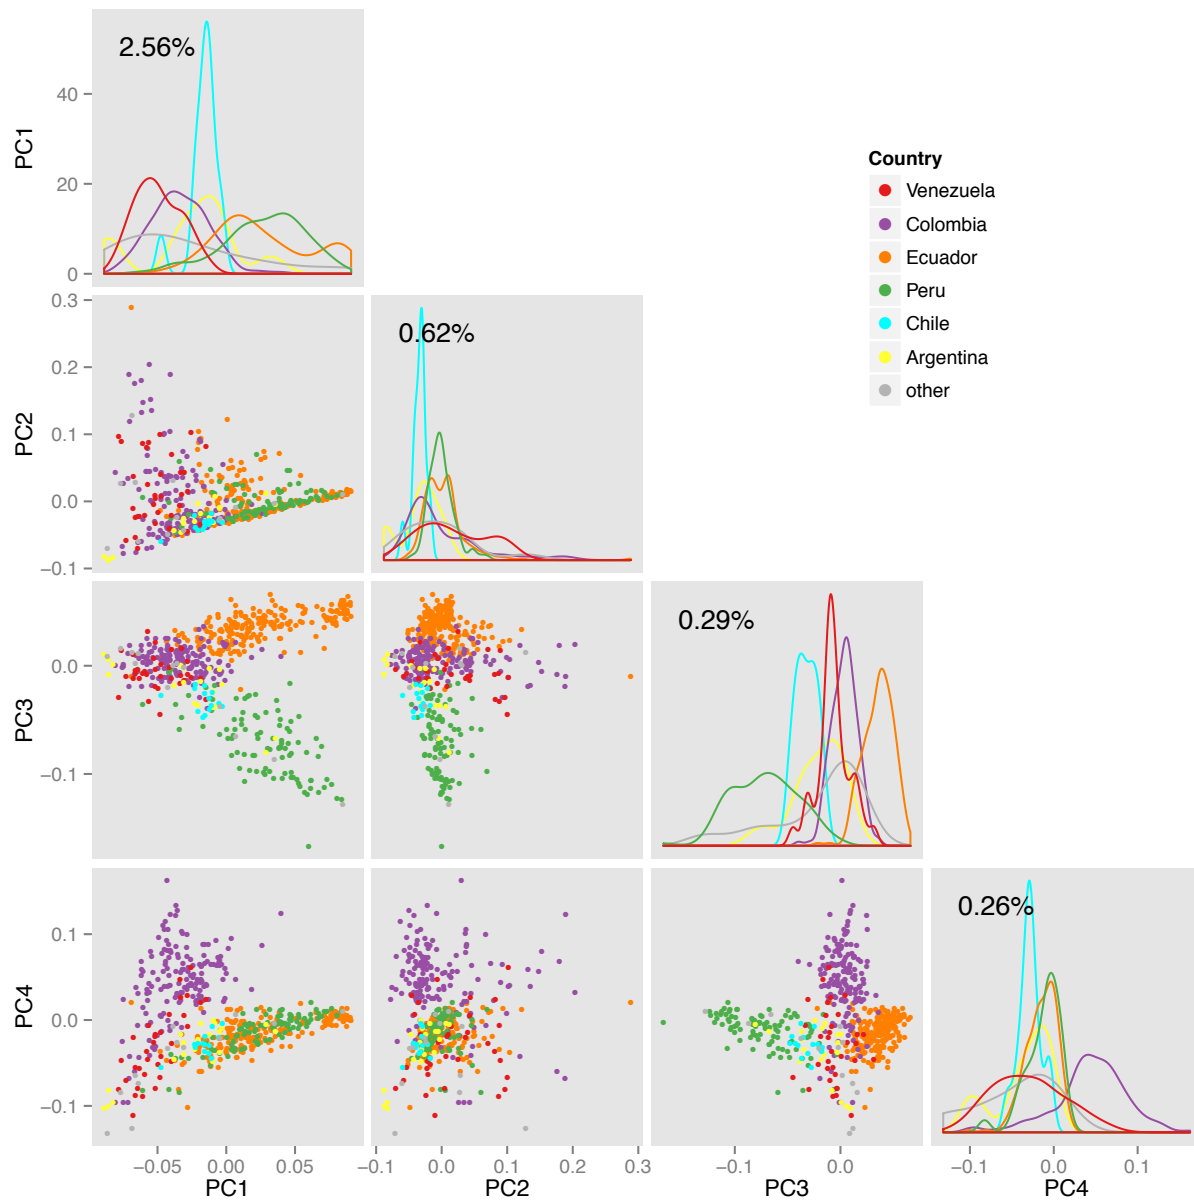

**Figure S7: PCA of HCHS/SOL participants with all four grandparents from the same South American country**

Pairs plots showing PCs calculated using 552 unrelated subjects with all four grandparents from the same South American country. Two outliers were excluded. The diagonals show density plots of each principal component. The SNP set used was identical to the overall PCA excluding the outliers with high East Asian ancestry.



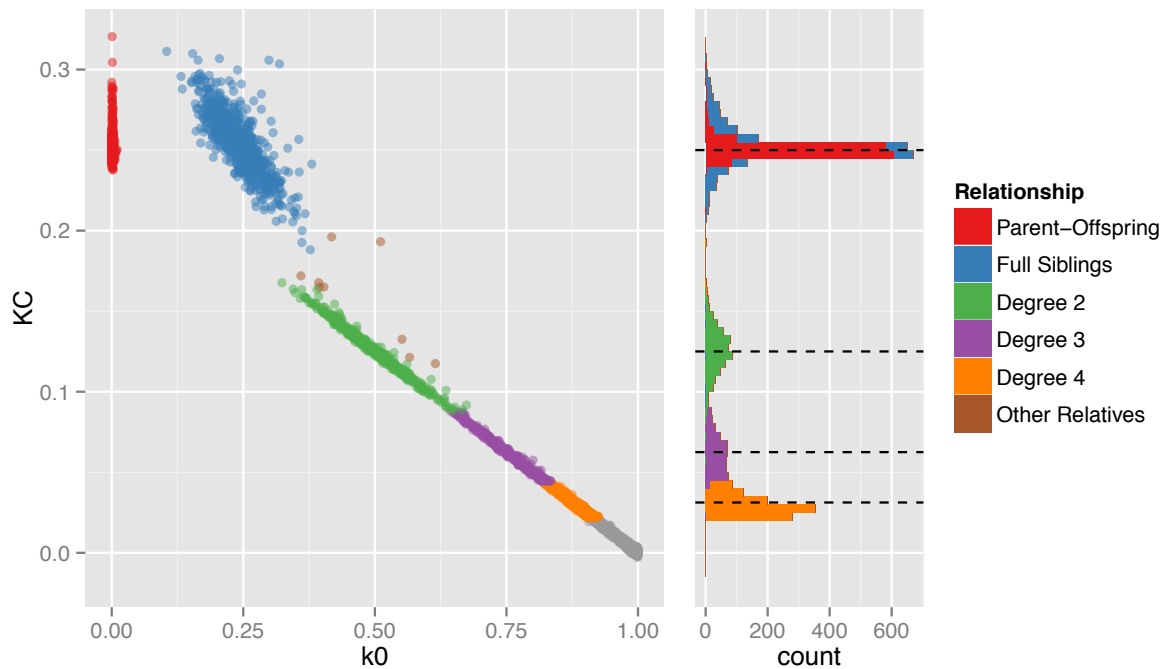

**Figure S8: Relatedness estimates for pairs of HCHS/SOL participants**

Relatedness was estimated with PC-Relate, excluding outliers with a high proportion of East Asian ancestry. Each point represents a pair of individuals. Because of the large number of unrelated pairs, only a random sample was included in the plot. The horizontal axis has estimates of  $k_0$ , which is the probability that, among the two alleles at a locus, zero are identical by descent. The vertical axis has estimates of the kinship coefficient,  $KC$ . A marginal histogram of  $KC$  color-coded by relationship (excluding unrelated subjects) is shown in the right panel. The black dashed lines represent the expected kinship coefficient for each degree of relatedness. A pair of individuals was assigned a relationship of degree  $d$  if  $2^{-(d+3/2)} < KC \leq 2^{-(d+1/2)}$ . Parent-Offspring pairs were distinguished from full siblings using a threshold of  $k_0 = 2^{-11/2}$ .

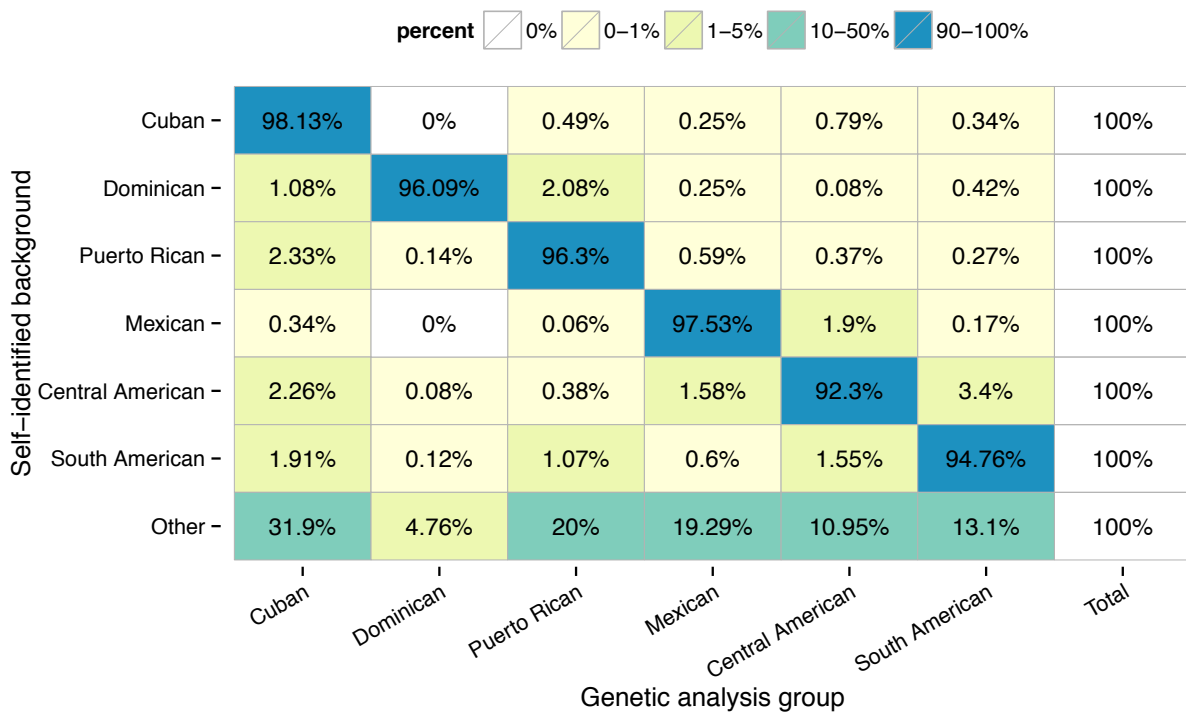

**Figure S9: Cross-classification of genetic analysis group and self-identified background group**

Each cell has the percentage of individuals within a background group that are in the specified genetic analysis group (i.e. percentage of the row total). Color coding is based on this percentage. Individuals in the genetic analysis group having the same value appear on the diagonal. "Other" includes subjects whose background is multiple, other or had a missing value.

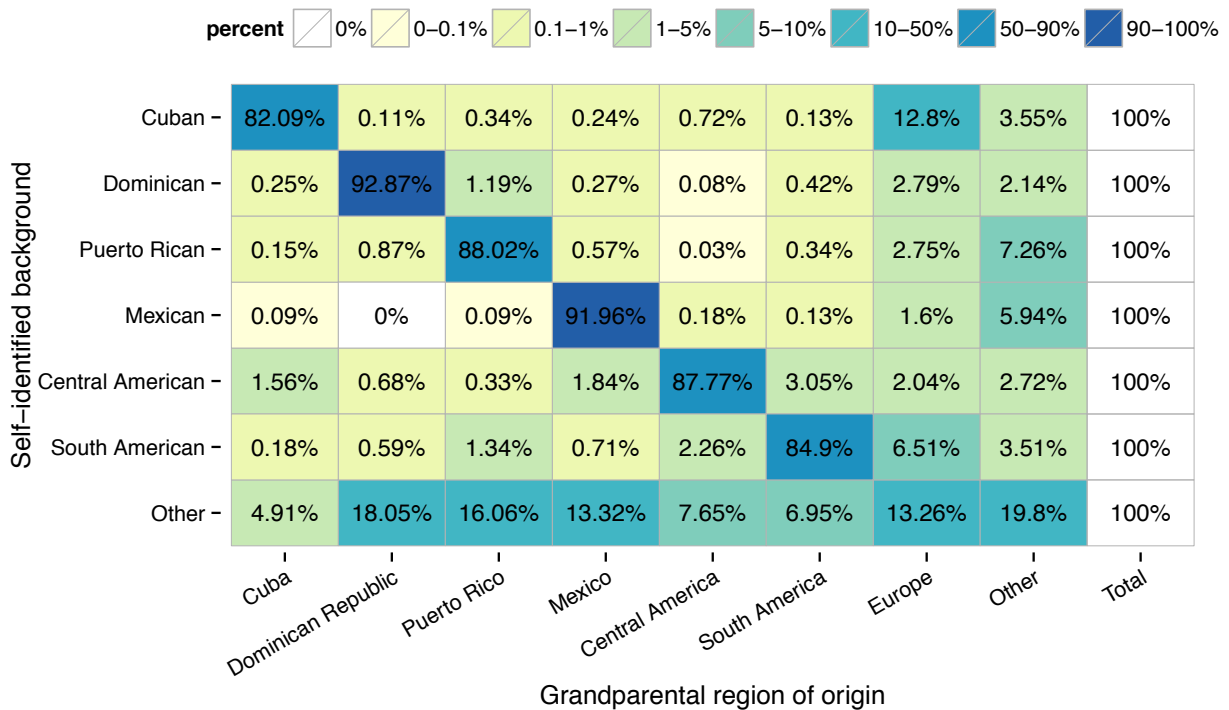

**Figure S10: Cross-classification of grandparental region of origin and self-identified background group**

Each cell (i,j) has the percentage of all grandparents for participants in the background group for the  $i^{th}$  row that originate from the region given in the  $j^{th}$  column. Color-coding is based on this percentage. “Other” background includes subjects whose background is multiple, other or had a missing value. “Other” grandparental region includes countries in regions other than the ones listed.

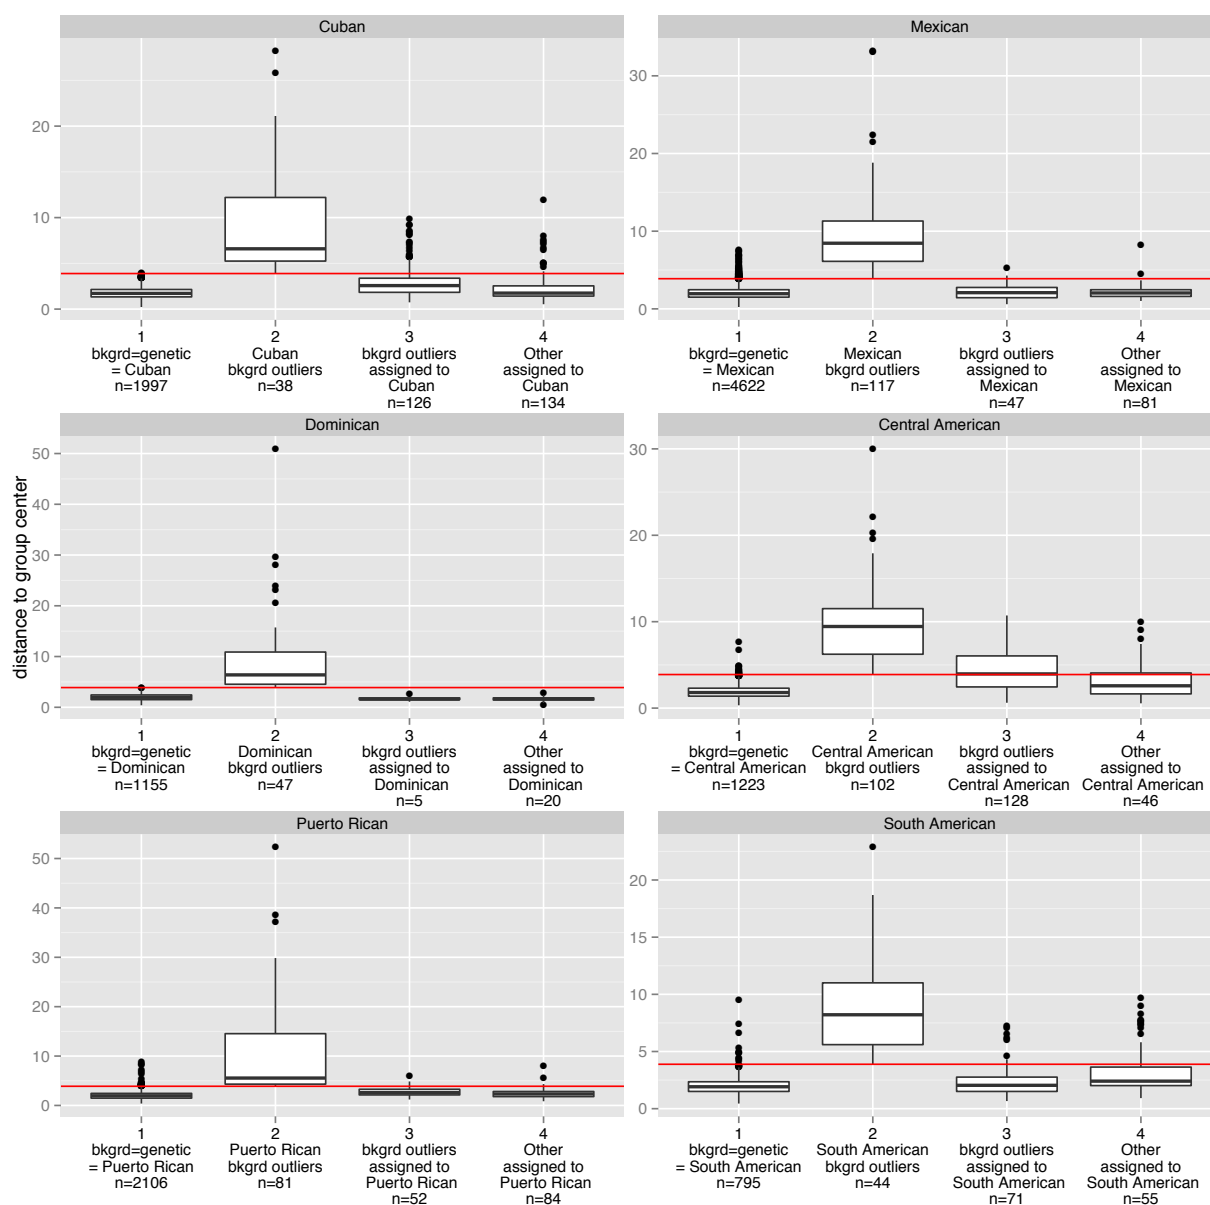

**Figure S11: Genetic homogeneity of genetic analysis groups evaluated with Mahalanobis distances**

Distributions of the Mahalanobis distances between individual points in the five-dimensional PC space and the center of a given hyper-ellipsoid. For the Mexican hyper-ellipsoid, the four boxplots include individuals who belong to (1) both the Mexican self-identified background and Mexican genetic analysis groups, (2) the Mexican self-identified background group and another (not Mexican) genetic analysis group, (3) one of the other (not Mexican) specific self-identified background groups and the Mexican genetic analysis group, and (4) the “Other” (i.e. multiple, other or missing values) self-identified background group and the Mexican genetic analysis group. The red line indicates the distance from the Mexican hyper-ellipsoid boundary to its center, which was one of the criteria for defining genetic analysis group. These descriptions apply to each plot, substituting for “Mexican” the appropriate hyper-ellipsoid label at the top of the plot.

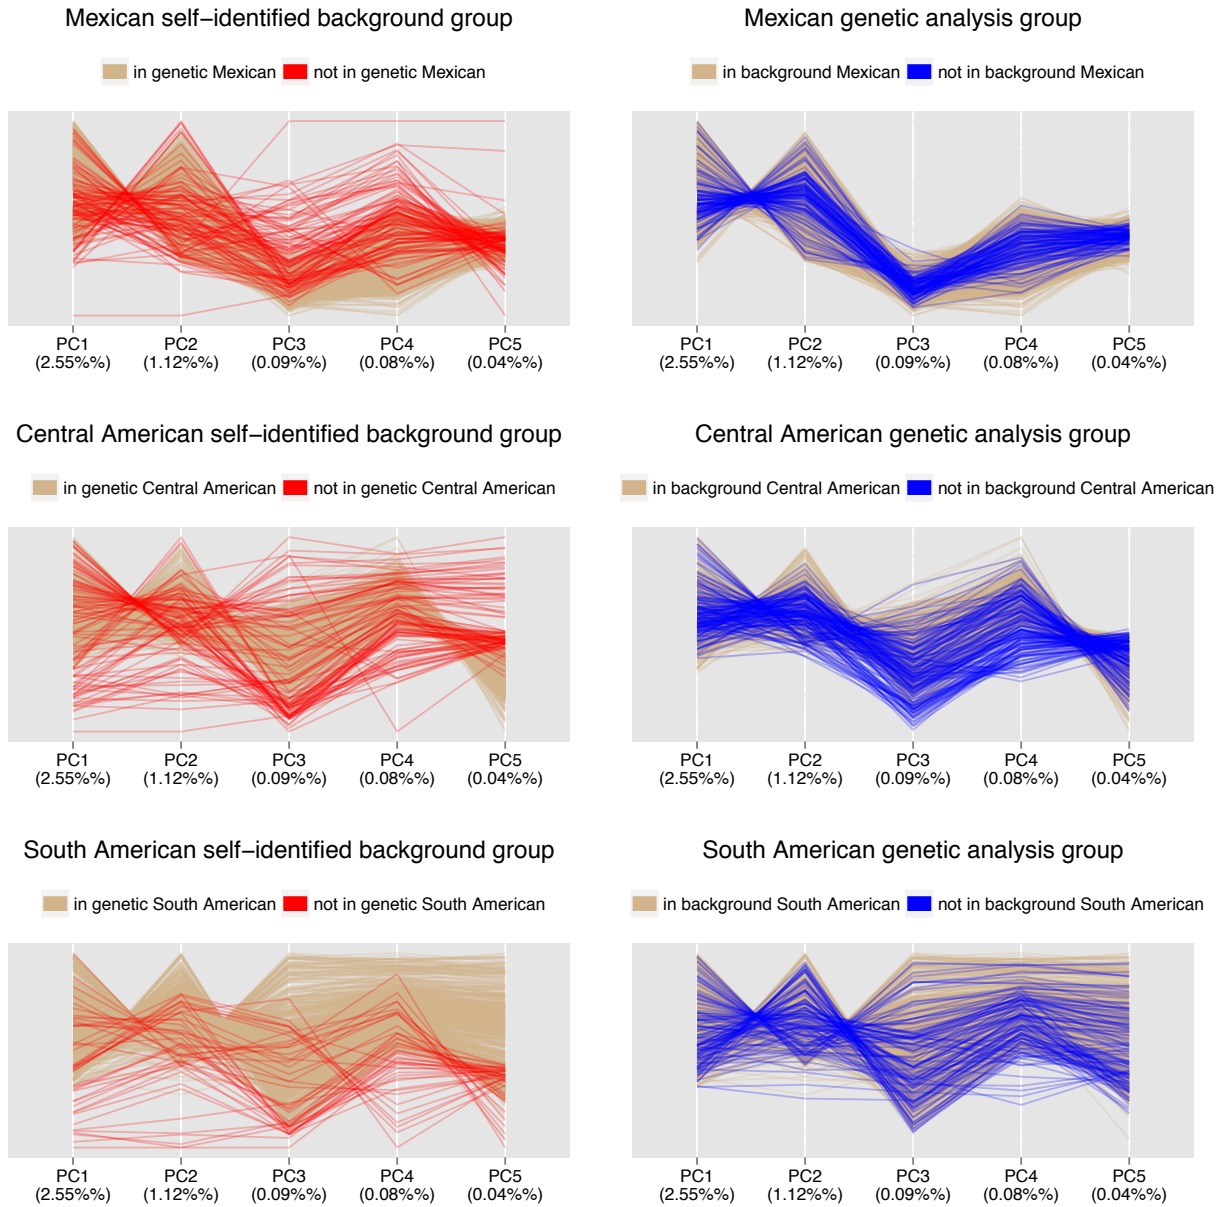

**Figure S12: Genetic homogeneity of genetic analysis groups evaluated with PCs: Mainland groups**

The two Mexican group plots show parallel coordinates for individuals of either Mexican self-identified background (left) or Mexican genetic analysis group (right), from the PCA of all individuals except the outliers with high East Asian ancestry. The vertical scale is the same for both plots. The left plot shows only individuals in the Mexican self-identified background group, distinguishing those that are also in the Mexican genetic analysis group from those that are not. The right plot shows only individuals that are in the Mexican genetic analysis group, distinguishing those that are also in the Mexican self-identified background group from those that are not. The left plot shows that individuals with self-identified Mexican background that are not in the Mexican genetic analysis group (red) consist of outliers for one or more PCs. The right plot shows that self-identified non-Mexican background individuals who are in the Mexican genetic analysis group are not outliers. The same description applies to the other two groups shown here, substituting for “Mexican” the group name in the plot title.

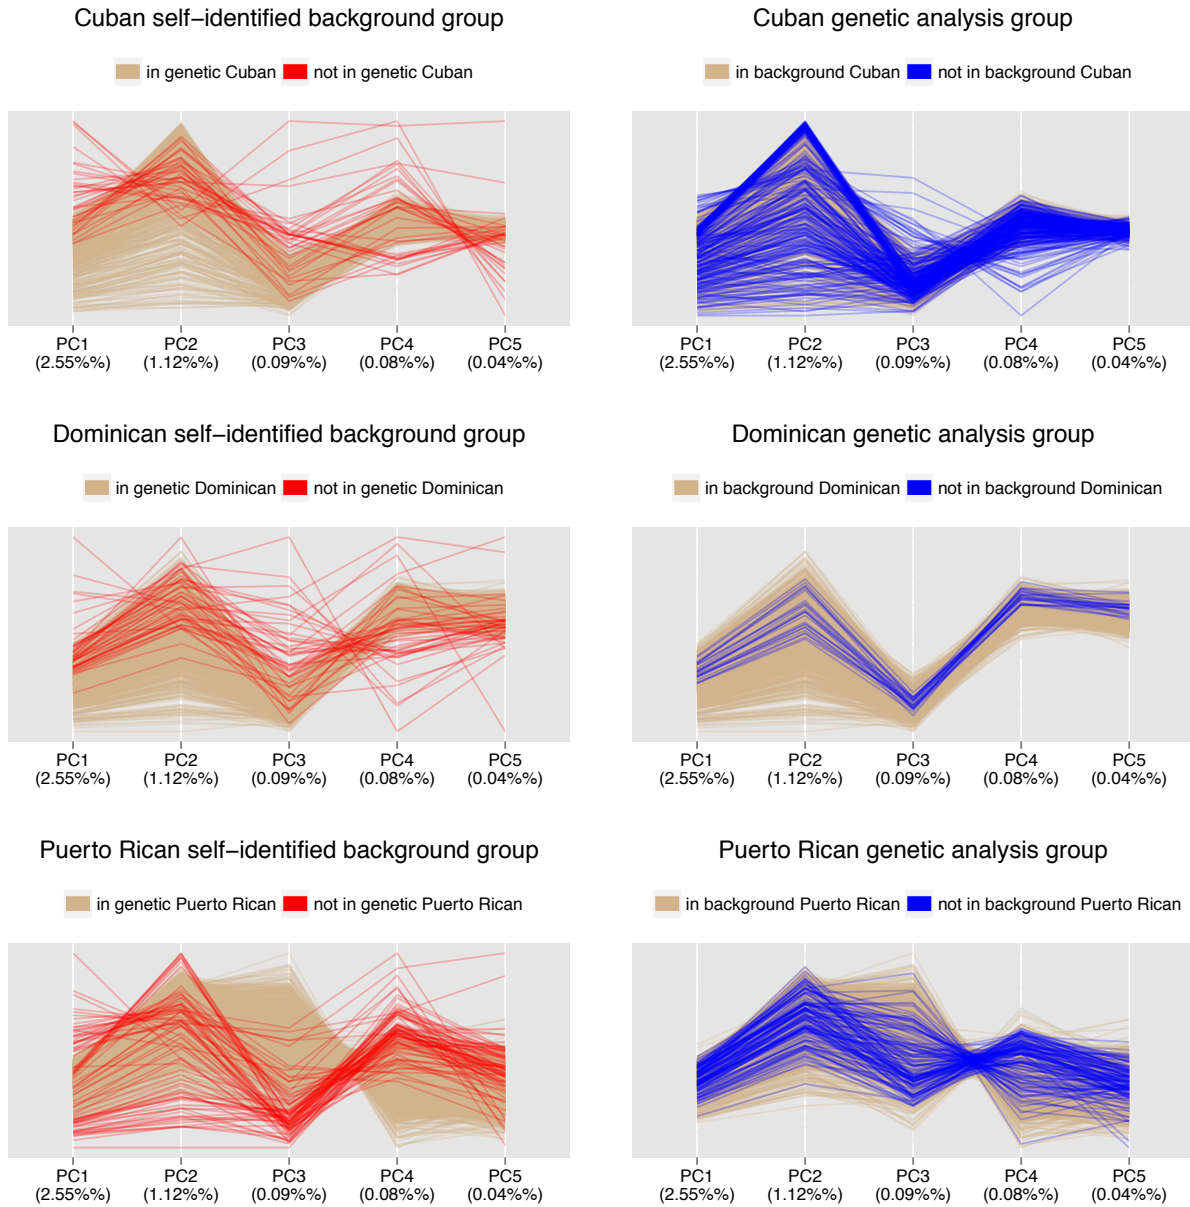

**Figure S13: Genetic homogeneity of genetic analysis groups evaluated with PCs: Caribbean groups**

The two Cuban group plots show parallel coordinates for individuals of either Cuban self-identified background (left) or Cuban genetic analysis group (right), from the PCA of all individuals except the outliers with high East Asian ancestry. The vertical scale is the same for both plots. The left plot shows only individuals in the Cuban self-identified background group, distinguishing those that are also in the Cuban genetic analysis group from those that are not. The right plot shows only individuals that are in the Cuban genetic analysis group, distinguishing those that are also in the Cuban self-identified background group from those that are not. The left plot shows that individuals with self-identified Cuban background that are not in the Cuban genetic analysis group (red) consist of outliers for one or more PCs. The right plot shows that self-identified non-Cuban background individuals who are in the Cuban genetic analysis group are not outliers. The same description applies to the other two groups shown here, substituting for “Cuban” the group name in the plot title.

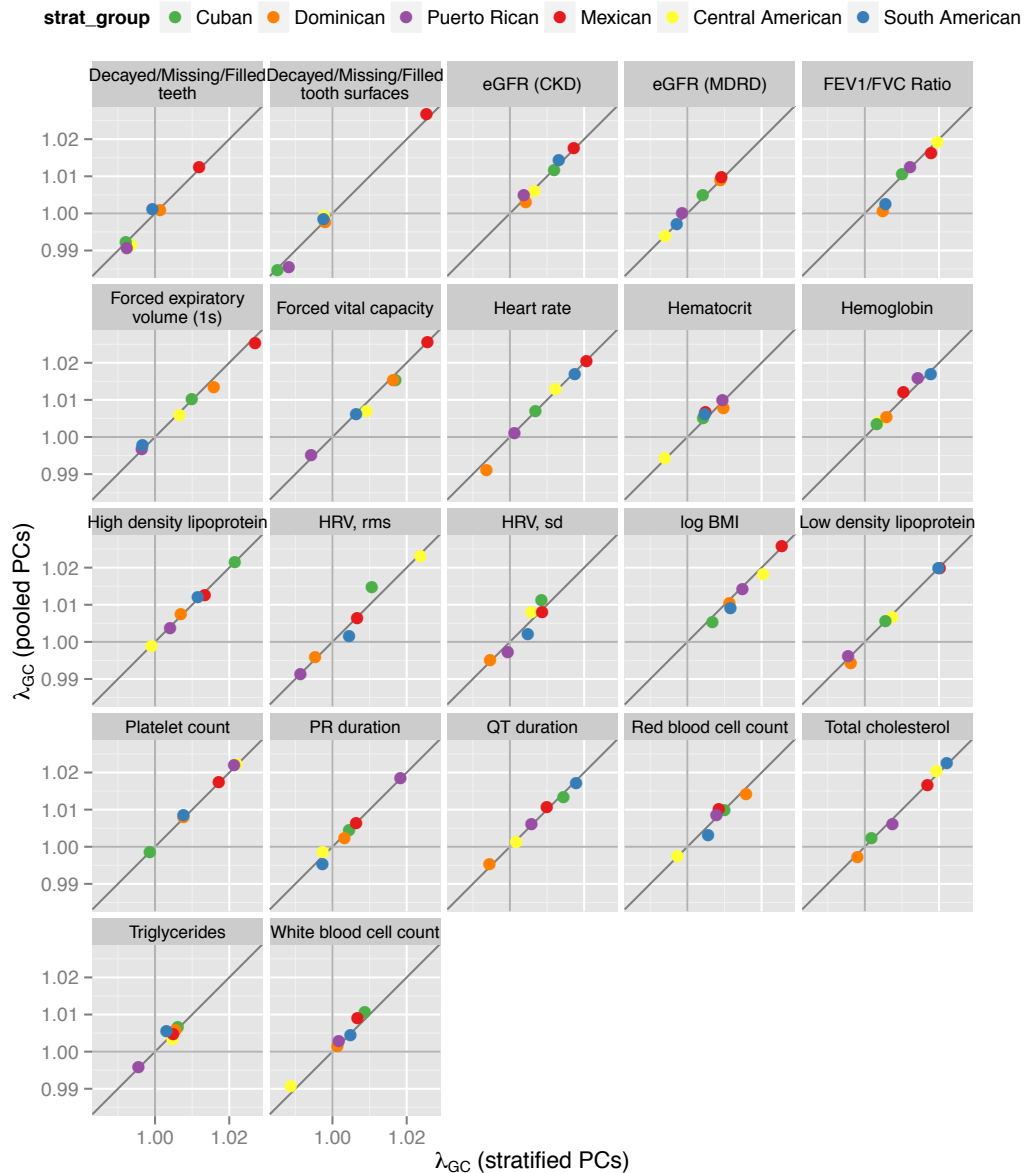

**Figure S14: Genomic inflation factor ( $\lambda_{GC}$ ) within each genetic analysis group for pooled PCs versus group-specific PCs**

For each of 22 biomedical traits,  $\lambda_{GC}$  was calculated within each genetic analysis group for analyses with pooled principal components versus group-specific principal components. Five PCs were used in each case. SNPs were filtered on effective N > 120 within each group. The median number of SNPs passing this filter for each group was: Cuban (8,206,000), Dominican (7,608,000), Puerto Rican (8,607,000), Mexican (8,660,000), Central American (6,736,000), and South American (5,817,000).

| Trait group            | Trait                                 | N      | $\lambda_{GC}$ |        |         |        |
|------------------------|---------------------------------------|--------|----------------|--------|---------|--------|
|                        |                                       |        | LMM            |        |         | LM     |
|                        |                                       |        | no PCs         | PC 1-5 | PC 1-20 | PC 1-5 |
| Anthropometrics        | log BMI                               | 12,705 | 1.081          | 1.050  | 1.049   | 1.152  |
| Blood cell count       | Hematocrit                            | 12,502 | 1.706          | 1.022  | 1.022   | 1.072  |
| Blood cell count       | Hemoglobin                            | 12,502 | 1.901          | 1.030  | 1.030   | 1.073  |
| Blood cell count       | Platelet count                        | 12,491 | 1.140          | 1.045  | 1.044   | 1.103  |
| Blood cell count       | Red blood cell count                  | 12,502 | 1.152          | 1.058  | 1.059   | 1.124  |
| Blood cell count       | White blood cell count                | 11,809 | 2.168          | 1.057  | 1.057   | 1.121  |
| Chronic kidney disease | eGFR (CKD)                            | 12,739 | 5.672          | 1.047  | 1.045   | 1.111  |
| Chronic kidney disease | eGFR (MDRD)                           | 12,739 | 5.840          | 0.999  | 0.998   | 1.073  |
| Dental                 | Decayed/Missing/Filled teeth          | 11,803 | 1.797          | 0.997  | 0.997   | 1.044  |
| Dental                 | Decayed/Missing/Filled tooth surfaces | 11,803 | 1.557          | 1.019  | 1.019   | 1.065  |
| Electrocardiography    | Heart rate                            | 10,216 | 1.889          | 1.044  | 1.046   | 1.076  |
| Electrocardiography    | HRV, rms                              | 10,798 | 1.253          | 1.025  | 1.025   | 1.051  |
| Electrocardiography    | HRV, sd                               | 10,798 | 1.339          | 1.018  | 1.020   | 1.034  |
| Electrocardiography    | PR duration                           | 11,686 | 1.645          | 1.041  | 1.041   | 1.099  |
| Electrocardiography    | QT duration                           | 11,932 | 1.272          | 1.021  | 1.021   | 1.086  |
| Lipids                 | High density lipoprotein              | 12,730 | 1.938          | 1.032  | 1.032   | 1.099  |
| Lipids                 | Low density lipoprotein               | 12,467 | 1.090          | 1.045  | 1.046   | 1.115  |
| Lipids                 | Total cholesterol                     | 12,731 | 1.098          | 1.031  | 1.031   | 1.106  |
| Lipids                 | Triglycerides                         | 12,730 | 4.407          | 1.001  | 1.001   | 1.053  |
| Pulmonary disease      | FEV1/FVC Ratio                        | 11,832 | 1.402          | 1.073  | 1.073   | 1.126  |
| Pulmonary disease      | Forced expiratory volume (1s)         | 11,833 | 6.972          | 1.043  | 1.043   | 1.101  |
| Pulmonary disease      | Forced vital capacity                 | 11,832 | 9.287          | 1.036  | 1.036   | 1.097  |

**Table S1: Genomic inflation factor ( $\lambda_{GC}$ ) from GWAS for models that differ in accounting for relatedness and ancestry**

$\lambda_{GC}$  values for GWAS of 22 different biomedical traits run with 1) no PCs, 2) the first five or 3) the first twenty PCs to control for confounding by ancestry, and 4) without random effects to control for correlation structure. The model for each analysis included sex, center, age, sampling weight, and other trait-specific covariates. Models in the “LMM” category also included random effects for household, block group, and polygenic effects due to relatedness, and the “LM” model used a simple linear model that ignored correlations among subjects due to relatedness, household and block group. Genetic analysis group was not included. Sample size (N) varied by trait-specific exclusion criteria. All  $\lambda_{GC}$  values were calculated using autosomal SNPs filtered by an effective minor allele count,  $\text{effN} > 120$ , as described in Methods. The number of SNPs used to calculate  $\lambda_{GC}$  varied by analysis due to the varying sample size, but a median of 1,898,000 genotyped SNPs and 12,030,000 imputed SNPs were used in the calculations.



| Trait group            | Trait                                 | AIC Difference |              |
|------------------------|---------------------------------------|----------------|--------------|
|                        |                                       | PC5 - PC5g     | PC20 - PC20g |
| Anthropometrics        | log BMI                               | 18.4           | 16.8         |
| Blood cell count       | Hematocrit                            | -6.6           | -6.9         |
| Blood cell count       | Hemoglobin                            | -6.6           | -7.4         |
| Blood cell count       | Platelet count                        | -4.7           | -4.3         |
| Blood cell count       | Red blood cell count                  | -6.6           | -7.0         |
| Blood cell count       | White blood cell count                | -0.5           | -0.9         |
| Chronic kidney disease | eGFR (CKD)                            | -1.9           | -0.9         |
| Chronic kidney disease | eGFR (MDRD)                           | -1.1           | -0.2         |
| Dental                 | Decayed/Missing/Filled teeth          | 19.3           | 18.9         |
| Dental                 | Decayed/Missing/Filled tooth surfaces | 21.8           | 21.6         |
| Electrocardiography    | Heart rate                            | 1.8            | 1.1          |
| Electrocardiography    | HRV, rms                              | -0.4           | -0.8         |
| Electrocardiography    | HRV, sd                               | -2.7           | -2.9         |
| Electrocardiography    | PR duration                           | -0.8           | -0.3         |
| Electrocardiography    | QT duration                           | 3.3            | 2.2          |
| Lipids                 | High density lipoprotein              | 10.1           | 8.7          |
| Lipids                 | Low density lipoprotein               | -5.4           | -5.1         |
| Lipids                 | Total cholesterol                     | -4.7           | -4.2         |
| Lipids                 | Triglycerides                         | 3.7            | 2.8          |
| Pulmonary disease      | FEV1/FVC Ratio                        | 0.1            | -0.4         |
| Pulmonary disease      | Forced expiratory volume (1s)         | 10.9           | 11.9         |
| Pulmonary disease      | Forced vital capacity                 | 15.8           | 15.6         |

**Table S2: Evaluation of the contribution of genetic analysis group to regression models using AIC**

Each of 22 traits was analyzed using an LMM in which the model included fixed effects for sex, age, recruitment center, sampling weight, and random effects for census block group, household, and polygenic effects due to relatedness. Models also included trait-specific covariates in some cases. In addition, each model included either the first five or the first twenty PCs as fixed effects to adjust for ancestry, either with or without genetic analysis group. The column “PC5-PC5g” is PC5 (AIC for the model with PC1-5 but no genetic analysis group) minus PC5g (AIC for the model with PC1-5 and genetic analysis group); similarly for the column labeled as “PC20 - PC20g”, except using PCs 1-20. A positive difference indicates that the model with genetic analysis group is a better fit than the model without genetic analysis group.

| Trait group            | Trait                                 | AIC difference |
|------------------------|---------------------------------------|----------------|
|                        |                                       | PC5b - PC5g    |
| Anthropometrics        | log BMI                               | 3.0            |
| Blood cell count       | Hematocrit                            | -3.0           |
| Blood cell count       | Hemoglobin                            | -2.1           |
| Blood cell count       | Platelet count                        | -4.2           |
| Blood cell count       | Red blood cell count                  | -1.3           |
| Blood cell count       | White blood cell count                | 5.2            |
| Chronic kidney disease | eGFR (CKD)                            | 0.5            |
| Chronic kidney disease | eGFR (MDRD)                           | 3.2            |
| Dental                 | Decayed/Missing/Filled teeth          | -10.2          |
| Dental                 | Decayed/Missing/Filled tooth surfaces | -14.4          |
| Electrocardiography    | Heart rate                            | 4.3            |
| Electrocardiography    | HRV, rms                              | 2.5            |
| Electrocardiography    | HRV, sd                               | 1.6            |
| Electrocardiography    | PR duration                           | 0.8            |
| Electrocardiography    | QT duration                           | -6.8           |
| Lipids                 | High density lipoprotein              | 0.4            |
| Lipids                 | Low density lipoprotein               | 0.0            |
| Lipids                 | Total cholesterol                     | 0.8            |
| Lipids                 | Triglycerides                         | 1.1            |
| Pulmonary disease      | FEV1/FVC Ratio                        | 0.3            |
| Pulmonary disease      | Forced expiratory volume (1s)         | 1.8            |
| Pulmonary disease      | Forced vital capacity                 | -3.0           |

**Table S3: Evaluation of the contribution of genetic analysis group versus self-identified background group to regression models using AIC**

Each of 22 traits was analyzed using an LMM in which the model included fixed effects for sex, recruitment center, age, sampling weight, and the first five PCs, and random effects for census block group, household, and polygenic effects due to relatedness. The model labeled as “PC5g” also had genetic analysis group as a fixed effect, while “PC5b” had self-identified background as a fixed effect. Models also included trait-specific covariates in some cases. Only participants with one of the six specific self-identified background groups were included in both analyses. A positive AIC difference indicates that the model with genetic analysis group is a better fit than the model with background group.

| Trait group            | Trait                                 | CV     |       |
|------------------------|---------------------------------------|--------|-------|
|                        |                                       | gengrp | bkgrd |
| Lipids                 | High density lipoprotein              | 0.06   | 0.07  |
| Dental                 | Decayed/Missing/Filled teeth          | 0.06   | 0.06  |
| Dental                 | Decayed/Missing/Filled tooth surfaces | 0.07   | 0.06  |
| Lipids                 | Triglycerides                         | 0.07   | 0.06  |
| Electrocardiography    | QT duration                           | 0.07   | 0.06  |
| Electrocardiography    | HRV, sd                               | 0.08   | 0.08  |
| Chronic kidney disease | eGFR (MDRD)                           | 0.08   | 0.09  |
| Lipids                 | Low density lipoprotein               | 0.08   | 0.09  |
| Electrocardiography    | HRV, rms                              | 0.09   | 0.08  |
| Electrocardiography    | PR duration                           | 0.09   | 0.09  |
| Lipids                 | Total cholesterol                     | 0.10   | 0.10  |
| Pulmonary disease      | Forced vital capacity                 | 0.12   | 0.11  |
| Chronic kidney disease | eGFR (CKD)                            | 0.12   | 0.12  |
| Blood cell count       | Hematocrit                            | 0.13   | 0.12  |
| Blood cell count       | Hemoglobin                            | 0.14   | 0.15  |
| Anthropometrics        | log BMI                               | 0.15   | 0.14  |
| Blood cell count       | White blood cell count                | 0.15   | 0.15  |
| Blood cell count       | Platelet count                        | 0.15   | 0.16  |
| Blood cell count       | Red blood cell count                  | 0.16   | 0.14  |
| Electrocardiography    | Heart rate                            | 0.16   | 0.16  |
| Pulmonary disease      | Forced expiratory volume (1s)         | 0.17   | 0.17  |
| Pulmonary disease      | FEV1/FVC Ratio                        | 0.27   | 0.27  |

**Table S4: Comparison of residual variance heterogeneity for genetic analysis versus self-identified background groups**

Coefficient of variation for residual variance by group is given for each of 22 biomedical traits. These statistics derive from LMMs assuming homoscedasticity and using either genetic analysis group (“gengrp”) or self-identified background group (“bkgrd”) as a fixed effect covariate. The sample set was the same for both models, and it included only individuals who had one of the six specific values for both genetic analysis group and self-identified background. Both models included fixed effects for sex, age, center, sampling weight, and PCs 1-5, and random effects for block group, household, and polygenic effects due to relatedness. In some cases, trait-specific fixed effect covariates were also included in both models.

| Trait group            | Trait                                 | $\lambda_{GC}$ |                 |
|------------------------|---------------------------------------|----------------|-----------------|
|                        |                                       | homoscedastic  | heteroscedastic |
| Dental                 | Decayed/Missing/Filled teeth          | 0.996          | 1.006           |
| Chronic kidney disease | eGFR (MDRD)                           | 0.999          | 1.013           |
| Lipids                 | Triglycerides                         | 1.001          | 1.009           |
| Electrocardiography    | HRV, sd                               | 1.019          | 1.010           |
| Dental                 | Decayed/Missing/Filled tooth surfaces | 1.019          | 1.013           |
| Electrocardiography    | QT duration                           | 1.021          | 1.016           |
| Blood cell count       | Hematocrit                            | 1.022          | 1.013           |
| Electrocardiography    | HRV, rms                              | 1.025          | 1.016           |
| Blood cell count       | Hemoglobin                            | 1.029          | 1.020           |
| Lipids                 | Total cholesterol                     | 1.031          | 1.014           |
| Lipids                 | High density lipoprotein              | 1.032          | 1.025           |
| Pulmonary disease      | Forced vital capacity                 | 1.035          | 1.031           |
| Electrocardiography    | PR duration                           | 1.041          | 1.024           |
| Pulmonary disease      | Forced expiratory volume (1s)         | 1.042          | 1.026           |
| Electrocardiography    | Heart rate                            | 1.044          | 1.020           |
| Blood cell count       | Platelet count                        | 1.045          | 1.026           |
| Lipids                 | Low density lipoprotein               | 1.046          | 1.027           |
| Chronic kidney disease | eGFR (CKD)                            | 1.047          | 1.029           |
| Anthropometrics        | log BMI                               | 1.049          | 1.041           |
| Blood cell count       | White blood cell count                | 1.056          | 1.027           |
| Blood cell count       | Red blood cell count                  | 1.058          | 1.030           |
| Pulmonary disease      | FEV1/FVC Ratio                        | 1.072          | 1.027           |

**Table S5: Genomic inflation ( $\lambda_{GC}$ ) for models with homoscedasticity and heteroscedasticity**

Each of 22 traits was analyzed using an LMM in which the model included fixed effects for sex, recruitment center, age, sampling weight, genetic analysis group, and the first five PCs, and random effects for census block group, household, and polygenic effects due to relatedness. The model labeled “homoscedastic” fit one residual variance for all subjects, while the model labeled “heteroscedastic” fit a different residual variance for each genetic analysis group. Models also included trait-specific covariates in some cases. The data in this table are plotted in Figure 8B.

| Trait group         | Trait                    | $\lambda_{GC}$ |            |          |
|---------------------|--------------------------|----------------|------------|----------|
|                     |                          | gengrp         | background | no group |
| Lipids              | Triglycerides            | 1.009          | 1.012      | 1.001    |
| Blood cell count    | Hematocrit               | 1.013          | 1.018      | 1.022    |
| Lipids              | Total cholesterol        | 1.014          | 1.014      | 1.031    |
| Electrocardiography | QT duration              | 1.016          | 1.016      | 1.022    |
| Blood cell count    | Hemoglobin               | 1.020          | 1.023      | 1.030    |
| Lipids              | High density lipoprotein | 1.025          | 1.025      | 1.032    |
| Blood cell count    | Platelet count           | 1.026          | 1.026      | 1.045    |
| Blood cell count    | White blood cell count   | 1.027          | 1.028      | 1.057    |
| Lipids              | Low density lipoprotein  | 1.027          | 1.026      | 1.045    |
| Pulmonary disease   | FEV1/FVC Ratio           | 1.027          | 1.026      | 1.073    |
| Blood cell count    | Red blood cell count     | 1.030          | 1.035      | 1.058    |
| Anthropometrics     | log BMI                  | 1.041          | 1.042      | 1.050    |

**Table S6: Comparison of  $\lambda_{GC}$  for models using different group definitions**

The table shows  $\lambda_{GC}$  for models with three different group definitions. All GWAS models were adjusted for sex, center, age, sampling weight, and PCs 1-5, and trait-specific covariates as fixed effects, and random effects for block group, household, and genetic relatedness were included. In addition, both models with group variables were run using heterogeneous residual variance. The “no group” model uses the full set of 12,784 subjects, minus any trait-specific exclusions. The “gengrp” model includes genetic analysis group as a fixed effect and excludes 37 subjects that have missing genetic analysis group. The “background” model includes self-reported background as a fixed effect, and excludes 425 subjects with missing self-reported background.

| Trait group         | Trait                    | N hits | slope [95% CI]      |                     | Refs       |
|---------------------|--------------------------|--------|---------------------|---------------------|------------|
|                     |                          |        | background          | no group            |            |
| Blood cell count    | White blood cell count   | 14     | 0.925 [0.909-0.941] | 1.059 [1.044-1.073] | 1-4        |
| Lipids              | High density lipoprotein | 72     | 0.931 [0.922-0.940] | 0.989 [0.987-0.991] | 5-7        |
| Anthropometrics     | log BMI                  | 104    | 0.936 [0.913-0.958] | 0.988 [0.975-1.001] | 8-12       |
| Lipids              | Triglycerides            | 40     | 0.951 [0.945-0.957] | 1.020 [1.017-1.023] | 6,7        |
| Pulmonary disease   | FEV1/FVC Ratio           | 21     | 0.960 [0.925-0.995] | 0.946 [0.893-1.000] | 13-15      |
| Blood cell count    | Hemoglobin               | 19     | 0.965 [0.944-0.986] | 1.023 [1.015-1.031] | 2,16-18    |
| Blood cell count    | Hematocrit               | 10     | 0.966 [0.904-1.028] | 1.047 [1.017-1.077] | 2,17,19    |
| Blood cell count    | Platelet count           | 59     | 0.969 [0.948-0.990] | 0.970 [0.960-0.979] | 2,19-22    |
| Electrocardiography | QT duration              | 35     | 0.981 [0.963-0.999] | 0.976 [0.970-0.982] | 23         |
| Lipids              | Total cholesterol        | 74     | 0.989 [0.981-0.997] | 0.976 [0.972-0.981] | 6,7        |
| Blood cell count    | Red blood cell count     | 18     | 0.995 [0.963-1.027] | 1.009 [0.992-1.026] | 2,17,18,24 |
| Lipids              | Low density lipoprotein  | 58     | 0.999 [0.991-1.008] | 0.976 [0.972-0.980] | 6,7        |
|                     | mean                     |        | 0.964 [0.950-0.978] | 0.998 [0.979-1.017] |            |

**Table S7: Comparison of Wald test statistics for the effects of SNPs with previously published trait associations, using models with different ethnic group definitions.**

For 12 biomedical traits, association tests were performed in HCHS/SOL to assess power to detect known hits from the literature for models utilizing genetic analysis group, self-identified background group, or no group variable. See Figure 10 for plots of these data. All models included adjustment for sex, center, age, sampling weight, PCs 1-5, and trait-specific covariates. Random effects included block group, household, and genetic relatedness. The models also included genetic analysis group (“gengrp”, up to 12,747 subjects); self-reported background (“background”, up to 12,359 subjects); or no group variable (“no group”, up to 12,784 subjects) as a covariate. For models using a group variable (“gengrp” and “background”), heterogeneous residual variance was fit by that group. The slopes and 95% confidence intervals are from a linear regression (through the origin) of test statistics for a given trait from either the background or no-group model, regressed on the corresponding test statistics from the genetic analysis group model. See Figure 10A for an example using log BMI. All test statistics are from the Wald test for the effect of the published SNP hit ( $\chi^2_{(1)}$ ) in HCHS/SOL data and were adjusted for  $\lambda_{GC}$  before fitting the linear model. The number of previously identified variants affecting each trait (“N hits”) is shown. The “mean” row gives the mean of the slope estimates for each model type and its 95% confidence interval. References for papers used to determine known hits for each trait are shown in the “Refs” column.

## References

- [1] Crosslin, D. R., McDavid, A., Weston, N., Nelson, S. C., Zheng, X., Hart, E., de Andrade, M., Kullo, I. J., McCarty, C. A., Doheny, K. F., et al. (2012). Genetic variants associated with the white blood cell count in 13,923 subjects in the eMERGE Network. *Hum Genet* 131, 639–652.
- [2] Kamatani, Y., Matsuda, K., Okada, Y., Kubo, M., Hosono, N., Daigo, Y., Nakamura, Y., and Kamatani, N. (2010). Genome-wide association study of hematological and biochemical traits in a Japanese population. *Nat Genet* 42, 210–215.
- [3] Nalls, M. A., Couper, D. J., Tanaka, T., van Rooij, F. J. A., Chen, M.-H., Smith, A. V., Toniolo, D., Zaki, N. A., Yang, Q., Greinacher, A., et al. (2011). Multiple loci are associated with white blood cell phenotypes. *PLoS Genet* 7, e1002113.
- [4] Reiner, A. P., Lettre, G., Nalls, M. A., Ganesh, S. K., Mathias, R., Austin, M. A., Dean, E., Arepalli, S., Britton, A., Chen, Z., et al. (2011). Genome-wide association study of white blood cell count in 16,388 African Americans: the continental origins and genetic epidemiology network (COGENT). *PLoS Genet* 7, e1002108.
- [5] Elbers, C. C., Guo, Y., Tragante, V., Van Iperen, E. P., Lanktree, M. B., Castillo, B. A., Chen, F., Yanek, L. R., Wojczynski, M. K., Li, Y. R., et al. (2012). Gene-centric meta-analysis of lipid traits in African, East Asian and Hispanic populations. *Plos One* 7.
- [6] Teslovich, T. M., Musunuru, K., Smith, A. V., Edmondson, A. C., Stylianou, I. M., Koseki, M., Pirruccello, J. P., Ripatti, S., Chasman, D. I., Willer, C. J., et al. (2010). Biological, clinical and population relevance of 95 loci for blood lipids. *Nature* 466, 707–713.
- [7] Willer, C. J., Schmidt, E. M., Sengupta, S., Peloso, G. M., Gustafsson, S., Kanoni, S., Ganna, A., Chen, J., Buchkovich, M. L., Mora, S., et al. (2013). Discovery and refinement of loci associated with lipid levels. *Nat Genet* 45, 1274–1283.
- [8] Berndt, S. I., Gustafsson, S., Magi, R., Ganna, A., Wheeler, E., Feitosa, M. F., Justice, A. E., Monda, K. L., Croteau-Chonka, D. C., Day, F. R., et al. (2013). Genome-wide meta-analysis identifies 11 new loci for anthropometric traits and provides insights into genetic architecture. *Nat Genet* 45, 501–512.
- [9] Locke, A. E., Kahali, B., Berndt, S. I., Justice, A. E., Pers, T. H., Day, F. R., Powell, C., Vedantam, S., Buchkovich, M. L., Yang, J., et al. (2015). Genetic studies of body mass index yield new insights for obesity biology. *Nature* 518, 197–206.
- [10] Monda, K. L., Chen, G. K., Taylor, K. C., Palmer, C., Edwards, T. L., Lange, L. A., Ng, M. C. Y., Adeyemo, A. A., Allison, M. A., Bielak, L. F., et al. (2013). A meta-analysis identifies new loci associated with body mass index in individuals of African ancestry. *Nat Genet* 45, 690–696.
- [11] Speliotes, E. K., Willer, C. J., Berndt, S. I., Monda, K. L., Thorleifsson, G., Jackson, A. U., Lango Allen, H., Lindgren, C. M., Luan, J., Magi, R., et al. (2010). Association analyses of 249,796 individuals reveal 18 new loci associated with body mass index. *Nat Genet* 42, 937–948.
- [12] Wen, W., Cho, Y.-S., Zheng, W., Dorajoo, R., Kato, N., Qi, L., Chen, C.-H., Delahanty, R. J., Okada, Y., Tabara, Y., et al. (2012). Meta-analysis identifies common variants associated with body mass index in east Asians. *Nat Genet* 44, 307–311.
- [13] Hancock, D. B., Eijgelsheim, M., Wilk, J. B., Gharib, S. A., Loehr, L. R., Marcianti, K. D., Franceschini, N., van Durme, Y. M. T. A., Chen, T.-H., Barr, R. G., et al. (2010). Meta-analyses of genome-wide association studies identify multiple loci associated with pulmonary function. *Nat Genet* 42, 45–52.

- [14] Repapi, E., Sayers, I., Wain, L. V., Burton, P. R., Johnson, T., Obeidat, M., Zhao, J. H., Ramasamy, A., Zhai, G., Vitart, V., et al. (2010). Genome-wide association study identifies five loci associated with lung function. *Nat Genet* 42, 36–44.
- [15] Soler Artigas, M., Loth, D. W., Wain, L. V., Gharib, S. A., Obeidat, M., Tang, W., Zhai, G., Zhao, J. H., Smith, A. V., Huffman, J. E., et al. (2011). Genome-wide association and large-scale follow up identifies 16 new loci influencing lung function. *Nat Genet* 43, 1082–1090.
- [16] Chambers, J. C., Zhang, W., Li, Y., Sehmi, J., Wass, M. N., Zabaneh, D., Hoggart, C., Bayele, H., McCarthy, M. I., Peltonen, L., et al. (2009). Genome-wide association study identifies variants in TMPRSS6 associated with hemoglobin levels. *Nat Genet* 41, 1170–1172.
- [17] Ganesh, S. K., Zakai, N. A., van Rooij, F. J. A., Soranzo, N., Smith, A. V., Nalls, M. A., Chen, M.-H., Kottgen, A., Glazer, N. L., Dehghan, A., et al. (2009). Multiple loci influence erythrocyte phenotypes in the CHARGE Consortium. *Nat Genet* 41, 1191–1198.
- [18] van der Harst, P., Zhang, W., Mateo Leach, I., Rendon, A., Verweij, N., Sehmi, J., Paul, D. S., Elling, U., Allayee, H., Li, X., et al. (2012). Seventy-five genetic loci influencing the human red blood cell. *Nature* 492, 369–375.
- [19] Li, J., Glessner, J. T., Zhang, H., Hou, C., Wei, Z., Bradfield, J. P., Mentch, F. D., Guo, Y., Kim, C., Xia, Q., et al. (2013). GWAS of blood cell traits identifies novel associated loci and epistatic interactions in Caucasian and African-American children. *Hum Mol Genet* 22, 1457–1464.
- [20] Gieger, C., Radhakrishnan, A., Cvejic, A., Tang, W., Porcu, E., Pistis, G., Serbanovic-Canic, J., Elling, U., Goodall, A. H., Labrune, Y., et al. (2011). New gene functions in megakaryopoiesis and platelet formation. *Nature* 480, 201–208.
- [21] Qayyum, R., Snively, B. M., Ziv, E., Nalls, M. A., Liu, Y., Tang, W., Yanek, L. R., Lange, L., Evans, M. K., Ganesh, S., et al. (2012). A meta-analysis and genome-wide association study of platelet count and mean platelet volume in African Americans. *PLoS Genet* 8, e1002491.
- [22] Shameer, K., Denny, J. C., Ding, K., Jouni, H., Crosslin, D. R., de Andrade, M., Chute, C. G., Peissig, P., Pacheco, J. A., Li, R., et al. (2014). A genome- and phenome-wide association study to identify genetic variants influencing platelet count and volume and their pleiotropic effects. *Hum Genet* 133, 95–109.
- [23] Arking, D. E., Pulit, S. L., Crotti, L., van der Harst, P., Munroe, P. B., Koopmann, T. T., Sotoodehnia, N., Rossin, E. J., Morley, M., Wang, X., et al. (2014). Genetic association study of QT interval highlights role for calcium signaling pathways in myocardial repolarization. *Nat Genet* 46, 826–836.
- [24] Soranzo, N., Spector, T. D., Mangino, M., Kuhnel, B., Rendon, A., Teumer, A., Willenborg, C., Wright, B., Chen, L., Li, M., et al. (2009). A genome-wide meta-analysis identifies 22 loci associated with eight hematological parameters in the HaemGen consortium. *Nat Genet* 41, 1182–1190.
